# Supplementary material for: Microbiological Hazards in Dry Dog Chews and Feeds
Source: PubMed Central journal article supplement (PMC7997464; doi:10.3390/ani11030631), 2021-02-27
Supplement: animals-11-00631-s001.pdf [file animals-11-00631-s001.pdf]

# Microbiological Hazards in Dry Dog Chews and Feeds

 Jagoda Kępińska-Pacelik <sup>1</sup>, Wioletta Biel <sup>1\*</sup>

<sup>1</sup> Department of Monogastric Animal Sciences, Division of Animal Nutrition and Food, West Pomeranian University of Technology in Szczecin, Klemensa Janickiego 29, 71-270 Szczecin, Poland; e-mail: wioletta.biel@zut.edu.pl, orcid.org/0000-0002-3385-6281; e-mail: jagoda.kepinskiacelik@gmail.com, orcid.org/0000-0001-5925-0694

\* Correspondence: wioletta.biel@zut.edu.pl

**Table S1.** RASFF notifications on pathogenic microorganisms in pet foods products in 2017 to 2020.

| No.<br><br><br>Copyright: © 2021 by the authors. Licensee MDPI, Basel, Switzerland. This article is an open access article distributed under the terms and conditions of the Creative Commons Attribution (CC BY) license ( <a href="http://creativecommons.org/licenses/by/4.0/">http://creativecommons.org/licenses/by/4.0/</a> ). | Notification type | Notifying country | Product categories          | Microorganism                                                                                      | Countries concerned by the notification [Origin country] | Risk decision |
|-----------------------------------------------------------------------------------------------------------------------------------------------------------------------------------------------------------------------------------------------------------------------------------------------------------------------------------------------------------------------------------------------------------------------|-------------------|-------------------|-----------------------------|----------------------------------------------------------------------------------------------------|----------------------------------------------------------|---------------|
| 1.                                                                                                                                                                                                                                                                                                                                                                                                                    | alert             | Germany           | dog chews                   | <i>Salmonella</i>                                                                                  | Poland                                                   | serious       |
| 2.                                                                                                                                                                                                                                                                                                                                                                                                                    | alert             | Germany           | dog chews                   | <i>Salmonella enterica</i> ser. Derby                                                              | Germany                                                  | undecided     |
| 3.                                                                                                                                                                                                                                                                                                                                                                                                                    | information       | Sweden            | dog chews                   | <i>Salmonella</i>                                                                                  | India                                                    | serious       |
| 4.                                                                                                                                                                                                                                                                                                                                                                                                                    | information       | Italy             | pet food                    | <i>Salmonella enterica</i> ser. Ohio                                                               | Spain                                                    | not serious   |
| 5.                                                                                                                                                                                                                                                                                                                                                                                                                    | alert             | Austria           | dog chews                   | <i>Salmonella enterica</i> ser. Rissen,<br><i>Salmonella enterica</i> ser. Typhimurium             | Germany                                                  | serious       |
| 6.                                                                                                                                                                                                                                                                                                                                                                                                                    | information       | Czech Republic    | lamb meal                   | <i>Salmonella enterica</i> ser. Bovismorbificans,<br><i>Salmonella enterica</i> ser. Mishmarhaemek | United Kingdom                                           | not serious   |
| 7.                                                                                                                                                                                                                                                                                                                                                                                                                    | alert             | United Kingdom    | frozen minced beef for dogs | <i>Salmonella enterica</i> ser. Paratyphi B (variant Java)                                         | United Kingdom                                           | serious       |
| 8.                                                                                                                                                                                                                                                                                                                                                                                                                    | information       | Croatia           | frozen pet food             | <i>Salmonella</i>                                                                                  | United Kingdom                                           | not serious   |

|     |                  |             |                             |                                                                                         |                |             |
|-----|------------------|-------------|-----------------------------|-----------------------------------------------------------------------------------------|----------------|-------------|
| 9.  | information      | Italy       | processed animal proteins   | <i>Salmonella</i>                                                                       | Spain          | not serious |
| 10. | border rejection | Germany     | dog chews                   | <i>Salmonella</i>                                                                       | Brazil         | serious     |
| 11. | border rejection | Germany     | dog chews (dried tripes)    | <i>Salmonella enterica</i> ser. Newport,<br><i>Salmonella enterica</i> ser. Typhimurium | India          | serious     |
| 12. | alert            | Germany     | dog chews                   | <i>Salmonella</i>                                                                       | Poland         | serious     |
| 13. | alert            | Belgium     | raw petfood                 | <i>Salmonella enterica</i> ser. Typhimurium,<br><i>Enterobacteriaceae</i>               | Netherlands    | serious     |
| 14. | information      | Poland      | dog chews (dried boar ears) | <i>Salmonella</i>                                                                       | Poland         | serious     |
| 15. | alert            | Norway      | frozen raw pet food         | <i>Salmonella enterica</i> ser. Derby                                                   | United Kingdom | serious     |
| 16. | information      | Belgium     | frozen raw pet food         | <i>Salmonella enterica</i> ser. Onderstepoort,<br><i>Enterobacteriaceae</i>             | Netherlands    | not serious |
| 17. | information      | Poland      | pet food                    | <i>Salmonella</i>                                                                       | Poland         | not serious |
| 18. | alert            | Austria     | dog chews                   | <i>Salmonella enterica</i> ser. Johannesburg                                            | Germany        | serious     |
| 19. | alert            | Slovenia    | frozen raw pet food         | <i>Salmonella enterica</i> ser. Agona,<br><i>Salmonella enterica</i> ser. Derby         | Netherlands    | serious     |
| 20. | alert            | Austria     | dog chews                   | <i>Salmonella enterica</i> ser. Infantis,<br><i>Enterobacteriaceae</i>                  | Germany        | serious     |
| 21. | information      | Croatia     | frozen sausages for dogs    | <i>Salmonella</i>                                                                       | Croatia        | not serious |
| 22. | alert            | Austria     | dog chews                   | <i>Salmonella enterica</i> ser. Infantis                                                | Poland         | serious     |
| 23. | alert            | Germany     | dog chews                   | <i>Salmonella</i>                                                                       | Netherlands    | serious     |
| 24. | information      | Netherlands | pet food                    | <i>Salmonella enterica</i> ser. Gaminara                                                | Thailand       | not serious |
| 25. | alert            | Austria     | chewing sticks              | <i>Salmonella enterica</i> ser. Brandenburg,<br><i>Salmonella enterica</i>              | Poland         | serious     |

|     |                     |         |                       |                                                                                                                                           |                   |             |
|-----|---------------------|---------|-----------------------|-------------------------------------------------------------------------------------------------------------------------------------------|-------------------|-------------|
|     |                     |         |                       | ser. London,<br><i>Salmonella enterica</i><br>ser. Rissen,<br><i>Salmonella enterica</i><br>ser. Typhimurium<br>monophasic                |                   |             |
| 26. | alert               | Austria | dog chews             | <i>Salmonella enterica</i><br>ser. Derby                                                                                                  | Poland            | serious     |
| 27. | alert               | Austria | dog chews             | <i>Salmonella enterica</i><br>ser. Livingstone                                                                                            | Switzerland       | serious     |
| 28. | alert               | Italy   | dog chews             | <i>Salmonella enterica</i><br>ser. Mapo                                                                                                   | Poland            | serious     |
| 29. | alert               | Italy   | dog chews             | <i>Salmonella enterica</i><br>ser. Derby                                                                                                  | Poland            | serious     |
| 30. | alert               | Austria | dog chews             | <i>Salmonella enterica</i><br>ser. Mbandaka,<br><i>Salmonella enterica</i><br>ser. Typhimurium<br>monophasic                              | Switzerland       | serious     |
| 31. | alert               | Austria | dog chews             | <i>Salmonella enterica</i><br>ser. Indiana                                                                                                | Poland            | serious     |
| 32. | alert               | Austria | dog chews             | <i>Salmonella enterica</i><br>ser. anatum                                                                                                 | Poland            | serious     |
| 33. | information         | Germany | raw pet<br>food       | <i>Salmonella</i>                                                                                                                         | Germany           | undecided   |
| 34. | alert               | Norway  | frozen raw<br>petfood | <i>Salmonella enterica</i><br>ser. Typhimurium                                                                                            | United<br>Kingdom | serious     |
| 35. | alert               | Belgium | dog chews             | <i>Salmonella enterica</i><br>ser. Brandenburg,<br><i>Salmonella enterica</i><br>ser. Idikan,<br><i>Enterobacteriaceae</i>                | Netherlands       | serious     |
| 36. | information         | Sweden  | pet food              | <i>Salmonella enterica</i><br>ser. Derby,<br><i>Salmonella enterica</i><br>ser. Dublin,<br><i>Salmonella enterica</i><br>ser. Typhimurium | Germany           | not serious |
| 37. | border<br>rejection | Germany | dog chews             | <i>Salmonella</i> ,<br><i>Enterobacteriaceae</i>                                                                                          | Turkey            | serious     |
| 38. | information         | Belgium | raw<br>petfood        | <i>Salmonella</i> ,<br><i>Enterobacteriaceae</i>                                                                                          | Netherlands       | not serious |

|     |                     |         |                                              |                                                                                                           |             |             |
|-----|---------------------|---------|----------------------------------------------|-----------------------------------------------------------------------------------------------------------|-------------|-------------|
| 39. | alert               | Austria | dog chews                                    | <i>Salmonella enterica</i><br>ser. Agona                                                                  | Turkey      | serious     |
| 40. | alert               | Austria | dog chews                                    | <i>Salmonella enterica</i><br>ser. Derby,<br><i>Salmonella enterica</i><br>ser. Typhimurium<br>monophasic | Belgium     | serious     |
| 41. | alert               | Austria | dog chews                                    | <i>Salmonella enterica</i><br>ser. Hessarek                                                               | Germany     | serious     |
| 42. | alert               | Austria | dried pig<br>ears                            | <i>Salmonella enterica</i><br>ser. Derby,<br><i>Salmonella enterica</i><br>ser. Livingstone               | Germany     | serious     |
| 43. | information         | Germany | dog chews                                    | <i>Salmonella</i>                                                                                         | France      | serious     |
| 44. | alert               | Austria | dried<br>chicken<br>feet                     | <i>Salmonella enterica</i><br>ser. Münster                                                                | Poland      | serious     |
| 45. | alert               | Austria | chicken<br>feet                              | <i>Salmonella enterica</i><br>ser. Gold Coast,<br><i>Enterobacteriaceae</i>                               | Poland      | serious     |
| 46. | alert               | Austria | dog chews                                    | <i>Salmonella enterica</i><br>ser. Indiana,<br><i>Enterobacteriaceae</i>                                  | Poland      | serious     |
| 47. | border<br>rejection | Germany | dog chew<br>(lamb ears)                      | <i>Salmonella</i>                                                                                         | Turkey      | serious     |
| 48. | alert               | Austria | dog chews<br>(bovine<br>scalp and<br>throat) | <i>Salmonella enterica</i><br>ser. Infantis                                                               | Slovakia    | serious     |
| 49. | information         | Belgium | frozen raw<br>dog food                       | <i>Salmonella enterica</i><br>ser. Indiana,<br><i>Enterobacteriaceae</i>                                  | Netherlands | not serious |
| 50. | alert               | Austria | dog chews                                    | <i>Salmonella enterica</i><br>ser. Derby,<br><i>Salmonella enterica</i><br>ser. Typhimurium<br>monophasic | Poland      | serious     |
| 51. | information         | Poland  | dog chews                                    | <i>Salmonella</i>                                                                                         | Turkey      | serious     |
| 52. | border<br>rejection | Germany | dog food                                     | <i>Salmonella enterica</i><br>ser. anatum                                                                 | Mexico      | serious     |
| 53. | information         | Belgium | frozen dog<br>food                           | <i>Salmonella</i> ,<br><i>Enterobacteriaceae</i>                                                          | Netherlands | not serious |

|     |                     |             |                                      |                                                                                                                                                     |             |             |
|-----|---------------------|-------------|--------------------------------------|-----------------------------------------------------------------------------------------------------------------------------------------------------|-------------|-------------|
| 54. | alert               | Germany     | dog chews                            | <i>Salmonella</i>                                                                                                                                   | India       | serious     |
| 55. | alert               | Germany     | dog chews                            | <i>Salmonella</i> ,<br><i>Enterobacteriaceae</i>                                                                                                    | Turkey      | serious     |
| 56. | information         | Belgium     | raw dog<br>food                      | <i>Salmonella enterica</i><br>ser. Derby,<br><i>Salmonella enterica</i><br>ser. Mbandaka,<br><i>Enterobacteriaceae</i>                              | Netherlands | not serious |
| 57. | alert               | Germany     | dog chews                            | <i>Salmonella</i>                                                                                                                                   | Poland      | serious     |
| 58. | alert               | Sweden      | dog chews                            | <i>Salmonella enterica</i><br>ser. Senftenberg                                                                                                      | Poland      | serious     |
| 59. | alert               | Belgium     | dog chews<br>from camel<br>and horse | <i>Salmonella</i> group E1                                                                                                                          | Poland      | serious     |
| 60. | alert               | Italy       | dried cow's<br>liver                 | <i>Salmonella</i>                                                                                                                                   | Italy       | serious     |
| 61. | alert               | Austria     | dog chews                            | <i>Salmonella enterica</i><br>ser. Derby                                                                                                            | Poland      | serious     |
| 62. | border<br>rejection | Netherlands | dog chews                            | <i>Salmonella</i>                                                                                                                                   | Thailand    | serious     |
| 63. | border<br>rejection | Netherlands | dog chews                            | <i>Salmonella</i>                                                                                                                                   | Thailand    | serious     |
| 64. | alert               | Austria     | dog chews                            | <i>Salmonella enterica</i><br>ser. Infantis                                                                                                         | Netherlands | serious     |
| 65. | alert               | Lithuania   | dog chews                            | <i>Salmonella enterica</i><br>ser. Derby,<br><i>Salmonella enterica</i><br>ser. Enteritidis,<br><i>Salmonella enterica</i><br>ser. London           | Belarus     | serious     |
| 66. | alert               | Austria     | dog chews                            | <i>Salmonella enterica</i><br>ser.<br>Derby, <i>Salmonella</i><br><i>enterica</i> ser.<br>Livingstone,<br><i>Salmonella enterica</i><br>ser. London | Germany     | serious     |

Source: own study on the basis of [82]
